# Supplementary material
Source: PubMed Central journal article supplement (PMC3414647)

## Supplemental Information

### **Altered expression of synapse and glutamate related genes in postmortem hippocampus of depressed subjects**

Vanja Duric<sup>1</sup>, Mounira Banasr<sup>1</sup>, Craig A. Stockmeier<sup>2,3</sup>, Arthur A. Simen<sup>1</sup>, Samuel S. Newton<sup>1</sup>, James C. Overholser<sup>4</sup>, George J. Jurjus<sup>3</sup>, Lesa Dieter<sup>4</sup>, and Ronald S. Duman<sup>1</sup>

<sup>1</sup>Department of Psychiatry, Yale University, New Haven, CT 06508, USA.

<sup>2</sup>Department of Psychiatry and Human Behavior, University of Mississippi Medical Center, Jackson, MS 39216, USA.

<sup>3</sup>Department of Psychiatry, Louis Stokes Cleveland VA Medical Center, <sup>4</sup>Department of Psychology, Case Western Reserve University, Cleveland, OH 44106, USA

**Supplemental Table S1.** Case Demographics for subjects with major depressive disorder (MDD).

| Experimental ID    | Age                | Sex/Race | Cause of Death            | PMI         | pH          | Toxicology                     | Medications <sup>1</sup>                         | Axis I Comorbidity                             |
|--------------------|--------------------|----------|---------------------------|-------------|-------------|--------------------------------|--------------------------------------------------|------------------------------------------------|
| 14B                | 30*                | M/AAm    | suicide, SIGSW            | 18          | 6.91        | ETOH                           | none                                             | Hx alcohol abuse                               |
| 6B                 | 34**               | F/C      | suicide, CO               | 24          | 6.27        | ETOH, CO, alprazolam           | alprazolam, valproic acid                        | none                                           |
| 10B                | 38*                | F/C      | suicide, OD               | 12          | 6.41        | diazepam, temazepam            | sertraline, temazepam                            | none                                           |
| 7B                 | 40 <sup>2</sup> ** | F/C      | CVD, accidental OD        | 25          | 6.32        | morphine, codeine, hydrocodone | fluoxetine, temazepam, hydrocodone               | sedative, hypnotic and anxiolytic disorder NOS |
| 16B                | 42**               | M/C      | suicide, SIGSW            | 20          | 6.8         | ND                             | none                                             | none                                           |
| 9B                 | 43**               | M/C      | suicide, hanging          | 21          | 6.73        | ND                             | none                                             | none                                           |
| 8B                 | 46                 | M/AAm    | homicide                  | 17          | 6.26        | ND                             | none                                             | none                                           |
| 12B                | 47*                | M/C      | suicide, SIGSW            | 11          | 6.84        | ETOH                           | none                                             | none                                           |
| 3B                 | 48                 | M/C      | suicide, SIGSW            | 21          | 6.9         | flurazepam                     | flurazepam, lorazepam                            | Hx alcohol abuse                               |
| 4B                 | 54                 | M/C      | suicide, CO               | 23          | 6.24        | CO, phenobarbital, phenytoin   | sertraline                                       | none                                           |
| 5B                 | 62                 | M/C      | suicide, SIGSW            | 20          | 6.47        | ND                             | buspirone <sup>3</sup> , lorazepam <sup>3</sup>  | none                                           |
| 13B                | 63                 | F/C      | CVD                       | 18          | 6.3         | ND                             | fluoxetine                                       | none                                           |
| 11B                | 67                 | F/C      | aneurysm                  | 17          | 6.68        | ND                             | doxepine                                         | agoraphobia, Hx stroke                         |
| 23B                | 68                 | M/C      | suicide, CO               | 4           | 6.21        | CO                             | none                                             | Parkinson's disease                            |
| 20B                | 73*                | M/C      | suicide, SIGSW            | 18          | 6.59        | diazepam, codeine              | none                                             | none                                           |
| 17B                | 74**               | M/C      | suicide, hanging          | 24          | 6.96        | ND                             | nortriptyline, L-DOPA                            | Parkinson's disease                            |
| 18B                | 77*                | F/C      | CVD                       | 32          | 6.79        | propoxyphene                   | trazodone, thioridazine, venlafaxine, clonazepam | none                                           |
| 21B                | 77*                | M/C      | suicide, hanging          | 26          | 6.74        | sertraline                     | sertraline                                       | none                                           |
| 15B                | 78**               | F/C      | suicide, fall from height | 25          | 6.94        | ND                             | none                                             | pathological gambling, delusional disorder     |
| 22B                | 82                 | M/C      | suicide, CO               | 12          | 6.46        | CO                             | risperidone, sertraline                          | benzodiazepine abuse                           |
| 19B                | 87                 | F/C      | aortic aneurysm           | 24          | 6.56        | ND                             | flurazepam                                       | none                                           |
| <b>DG Average</b>  | <b>61.3</b>        |          |                           | <b>18.2</b> | <b>6.56</b> |                                |                                                  |                                                |
| <b>SD</b>          | <b>16.9</b>        |          |                           | <b>6.8</b>  | <b>0.24</b> |                                |                                                  |                                                |
| <b>SEM</b>         | <b>4.4</b>         |          |                           | <b>1.8</b>  | <b>0.06</b> |                                |                                                  |                                                |
| <b>CA1 Average</b> | <b>59.2</b>        |          |                           | <b>19.7</b> | <b>6.54</b> |                                |                                                  |                                                |
| <b>SD</b>          | <b>16.7</b>        |          |                           | <b>5.7</b>  | <b>0.27</b> |                                |                                                  |                                                |
| <b>SEM</b>         | <b>4.3</b>         |          |                           | <b>1.5</b>  | <b>0.07</b> |                                |                                                  |                                                |

AAm, African American; C, Caucasian; CO, carbon monoxide; CVD, cardiovascular disease; ETOH, ethanol; F, female; Hx, history of alcohol abuse but not currently active; M, male; ND, no psychotropic medication detected; OD, drug overdose; PMI, postmortem interval (hours); SIGSW, self-inflicted gunshot wound; <sup>1</sup>Psychotropic prescriptions within last month; <sup>2</sup>MDD in remission; <sup>3</sup>prescriptions for six days prior to death; \*, samples present only in array sets for the dentate gyrus; \*\*, samples present only in array sets for CA1. Table adopted from Duric *et al.* (2010).

**Supplemental Table S2.** Case Demographics of matched control subjects.

| Experimental ID    | Age         | Sex/race | Cause of death              | PMI         | pH          | Toxicology   |
|--------------------|-------------|----------|-----------------------------|-------------|-------------|--------------|
| 8D                 | 37          | M/C      | hemorrhagic pancreatitis    | 17          | 6.47        | ND           |
| 9D                 | 43          | M/C      | pulmonary thromboemboli     | 23          | 6.49        | propoxyphene |
| 10D                | 45*         | F/AAm    | CVD                         | 9           | 6.86        | ND           |
| 3D                 | 46          | M/AAm    | CVD                         | 19          | 6.95        | ND           |
| 6D                 | 46          | F/C      | homicide                    | 24          | 6.32        | ND           |
| 16D                | 47**        | M/C      | pulmonary embolism          | 25          | 6.1         | propoxyphene |
| 7D                 | 49          | F/AAm    | CVD                         | 29          | 6.57        | ND           |
| 1D                 | 50**        | F/C      | CVD                         | 27          | 6.74        | ND           |
| 5D                 | 54**        | M/AAm    | CVD                         | 19          | 6.52        | ND           |
| 4D                 | 56          | M/C      | hypertrophic cardiomyopathy | 25          | 6.14        | ND           |
| 14D                | 26          | M/AAm    | homicide                    | 13          | 6.66        | ND           |
| 15D                | 83          | F/C      | CVD                         | 25          | 6.67        | ND           |
| 23D                | 66          | M/C      | CVD                         | 12          | 7.17        | ND           |
| 13D                | 67          | F/AAm    | CVD                         | 28          | 6.4         | ND           |
| 20D                | 69*         | M/C      | aortic aneurysm             | 18          | 6.7         | ND           |
| 17D                | 70          | M/C      | CVD                         | 20          | 6.81        | ND           |
| 21D                | 77*         | M/C      | CVD                         | 24          | 6.56        | ND           |
| 18D                | 80          | F/C      | CVD                         | 21          | 6.78        | ND           |
| 22D                | 82          | M/C      | aneurysm                    | 16          | 6.72        | ND           |
| 19D                | 84          | F/C      | CVD                         | 22          | 6.23        | ND           |
| <b>DG Average</b>  | <b>61.1</b> |          |                             | <b>20.5</b> | <b>6.61</b> |              |
| <b>SD</b>          | <b>16.0</b> |          |                             | <b>5.5</b>  | <b>0.28</b> |              |
| <b>SEM</b>         | <b>4.1</b>  |          |                             | <b>1.4</b>  | <b>0.07</b> |              |
| <b>CA1 Average</b> | <b>58.5</b> |          |                             | <b>21.8</b> | <b>6.56</b> |              |
| <b>SD</b>          | <b>15.3</b> |          |                             | <b>4.8</b>  | <b>0.30</b> |              |
| <b>SEM</b>         | <b>4.0</b>  |          |                             | <b>1.2</b>  | <b>0.08</b> |              |

AAm, African American; C, Caucasian; CVD, cardiovascular disease; F, female; M, male; ND, no psychotropic medication detected, PMI, postmortem interval (hours); \*, samples present only in array sets for the dentate gyrus; \*\*, samples present only in array sets for CA1. Table adopted from Duric *et al.* (2010).

**Supplemental Table S3.** Human subject pairs and corresponding sample RNA integrity numbers (RIN) that were used in microarray analysis.

**Dentate Gyrus (n = 15)**

| <i>Microarray Pairs:</i> | <u>Sample#</u> | <u>RIN</u> |
|--------------------------|----------------|------------|
|                          | <b>3B</b>      | 6.8        |
|                          | <b>3D</b>      | 6.1        |
|                          | <b>4B</b>      | 5.1        |
|                          | <b>4D</b>      | 5.6        |
|                          | <b>5B</b>      | 6.9        |
|                          | <b>23D</b>     | 7.5        |
|                          | <b>8B</b>      | 5.5        |
|                          | <b>8D</b>      | 5.4        |
|                          | <b>10B</b>     | 6.2        |
|                          | <b>10D</b>     | 7.4        |
|                          | <b>11B</b>     | 6.6        |
|                          | <b>13D</b>     | 7          |
|                          | <b>12B</b>     | 6.4        |
|                          | <b>9D</b>      | 5.6        |
|                          | <b>13B</b>     | 5.6        |
|                          | <b>6D</b>      | 6.1        |
|                          | <b>14B</b>     | 7.4        |
|                          | <b>7D</b>      | 6.4        |
|                          | <b>18B</b>     | 5.8        |
|                          | <b>18D</b>     | 5.8        |
|                          | <b>19B</b>     | 4.9        |
|                          | <b>19D</b>     | 5          |
|                          | <b>20B</b>     | 6.8        |
|                          | <b>20D</b>     | 7.3        |
|                          | <b>21B</b>     | 5.6        |
|                          | <b>21D</b>     | 5.5        |
|                          | <b>22B</b>     | 5.2        |
|                          | <b>22D</b>     | 6.2        |
|                          | <b>23B</b>     | 6.2        |
|                          | <b>17D</b>     | 7.7        |

Average RIN for all samples      6.2  
 Average RIN for Control samples      6.3  
 Average RIN for MDD samples      6.1

**CA1 (n = 15)**

| <i>Microarray Pairs:</i> | <u>Sample#</u> | <u>RIN</u> |
|--------------------------|----------------|------------|
|                          | <b>3B</b>      | 4.9        |
|                          | <b>3D</b>      | 4.7        |
|                          | <b>4B</b>      | 5          |
|                          | <b>4D</b>      | 4.8        |
|                          | <b>5B</b>      | 5          |
|                          | <b>5D</b>      | 4.6        |
|                          | <b>6B</b>      | 4.8        |
|                          | <b>7D</b>      | 6.6        |
|                          | <b>7B</b>      | 4.5        |
|                          | <b>1D</b>      | 4.6        |
|                          | <b>8B</b>      | 4.8        |
|                          | <b>8D</b>      | 6.4        |
|                          | <b>9B</b>      | 6.3        |
|                          | <b>9D</b>      | 5.8        |
|                          | <b>11B</b>     | 6          |
|                          | <b>13D</b>     | 6.5        |
|                          | <b>13B</b>     | 6.3        |
|                          | <b>6D</b>      | 5.2        |
|                          | <b>15B</b>     | 5.4        |
|                          | <b>18D</b>     | 6.8        |
|                          | <b>16B</b>     | 6.1        |
|                          | <b>16D</b>     | 5.9        |
|                          | <b>17B</b>     | 5.8        |
|                          | <b>23D</b>     | 6.2        |
|                          | <b>19B</b>     | 5.3        |
|                          | <b>19D</b>     | 5.4        |
|                          | <b>22B</b>     | 4.6        |
|                          | <b>22D</b>     | 4.4        |
|                          | <b>23B</b>     | 5.8        |
|                          | <b>17D</b>     | 4.8        |

Average RIN for all samples      5.4  
 Average RIN for Control samples      5.5  
 Average RIN for MDD samples      5.4

**Supplemental Table S4.** Cofactorial analysis of genes of interest found in DG microarray data.

| Gene          | Fold Change (log2) | Fold Change | Q-value (No Adjust) | Q (ADT) | Q ( CNS Dis) | Q (pH) | Q (PMI) | Q (Suicide) | Q (Age) | Q (Sex) | A0S0    | A1S0    | A1S1    | Error Variance |
|---------------|--------------------|-------------|---------------------|---------|--------------|--------|---------|-------------|---------|---------|---------|---------|---------|----------------|
| DLG1          | -0.21              | 0.86        | 0.2247              | 0.7648  | 0.3942       | 0.2353 | 0.3336  | 0.5624      | 0.2677  | 0.2634  | 0.2298  | 0.4454  | 0.4435  | 0.1109         |
| DLG2          | -1.30              | 0.41        | 0.0065              | 0.0181  | 0.0185       | 0.0027 | 0.0170  | 0.1165      | 0.0070  | 0.0069  | -0.6819 | 0.4799  | 0.7107  | 0.8926         |
| DLG3          | -0.30              | 0.81        | 0.0140              | 0.0564  | 0.0199       | 0.0190 | 0.0261  | 0.0679      | 0.0202  | 0.0163  | -0.3780 | 0.0041  | -0.1391 | 0.0399         |
| DLG4          | 0.08               | 1.05        | 0.7728              | 0.8872  | 0.7635       | 0.7978 | 0.7239  | 0.8953      | 0.7647  | 0.7682  | 0.4626  | 0.3882  | 0.3869  | 0.1966         |
| GRIA1         | -1.94              | 0.26        | 0.0005              | 0.0029  | 0.0011       | 0.0005 | 0.0011  | 0.0153      | 0.0007  | 0.0005  | -0.9499 | 0.8580  | 1.0841  | 0.8897         |
| GRIA1.1       | -0.65              | 0.64        | 0.0570              | 0.1143  | 0.0917       | 0.0328 | 0.0900  | 0.2511      | 0.0567  | 0.0537  | 0.2547  | 0.8787  | 0.9143  | 0.4730         |
| GRIA2         | 0.26               | 1.20        | 0.0979              | 0.4018  | 0.0277       | 0.1049 | 0.0473  | 0.4048      | 0.1215  | 0.1012  | 1.3868  | 1.1191  | 1.1241  | 0.0884         |
| GRIA2.1       | 0.23               | 1.17        | 0.1153              | 0.3654  | 0.0245       | 0.1233 | 0.0789  | 0.5149      | 0.1489  | 0.1184  | 1.6684  | 1.4721  | 1.4187  | 0.0698         |
| GRIA3         | 0.07               | 1.05        | 0.2991              | 0.6719  | 0.2403       | 0.3014 | 0.4608  | 0.5183      | 0.0862  | 0.3124  | -0.1589 | -0.2558 | -0.2163 | 0.0130         |
| GRIA3.1       | -2.90              | 0.13        | 0.0003              | 0.0024  | 0.0007       | 0.0004 | 0.0007  | 0.0064      | 0.0004  | 0.0004  | -1.0682 | 1.9845  | 1.7270  | 1.8434         |
| GRIA3.2       | 0.10               | 1.07        | 0.4272              | 0.6309  | 0.6178       | 0.4410 | 0.5537  | 0.8816      | 0.4475  | 0.5116  | -0.1664 | -0.2099 | -0.3029 | 0.0499         |
| GRIA3.3       | 0.00               | 1.00        | 0.9750              | 0.9959  | 0.9881       | 0.9863 | 0.9974  | 0.8694      | 0.9692  | 0.9429  | -0.2128 | -0.2458 | -0.1858 | 0.0169         |
| GRIA3.4       | -0.49              | 0.71        | 0.0046              | 0.0128  | 0.0076       | 0.0061 | 0.0090  | 0.0500      | 0.0063  | 0.0051  | -0.4803 | 0.0392  | -0.0167 | 0.0814         |
| GRIA4         | -0.28              | 0.82        | 0.0066              | 0.0533  | 0.0163       | 0.0061 | 0.0163  | 0.0950      | 0.0092  | 0.0085  | -0.3500 | -0.0523 | -0.0827 | 0.0266         |
| GRIN1         | 0.38               | 1.30        | 0.1020              | 0.4842  | 0.0567       | 0.0986 | 0.0675  | 0.6503      | 0.1196  | 0.1134  | 0.8146  | 0.5876  | 0.3310  | 0.1975         |
| GRIN1.1       | 0.08               | 1.06        | 0.8396              | 0.8688  | 0.5107       | 0.8766 | 0.6473  | 0.7954      | 0.8738  | 0.8569  | 0.5112  | 0.3159  | 0.5077  | 0.4820         |
| GRIN1.2       | 0.20               | 1.15        | 0.5785              | 0.9790  | 0.4483       | 0.5931 | 0.5917  | 0.6076      | 0.5961  | 0.6301  | 0.3615  | -0.0055 | 0.2649  | 0.5214         |
| GRIN2A        | -0.28              | 0.82        | 0.2796              | 0.2625  | 0.5533       | 0.2922 | 0.3287  | 0.7748      | 0.3051  | 0.2774  | -0.2149 | -0.0537 | 0.1404  | 0.2610         |
| GRIN2B        | -0.07              | 0.95        | 0.5306              | 0.2962  | 0.4357       | 0.5829 | 0.4261  | 0.8942      | 0.6141  | 0.4690  | -0.2835 | -0.2488 | -0.1846 | 0.0353         |
| GRIN2C        | -0.09              | 0.94        | 0.7761              | 0.7940  | 0.6451       | 0.7426 | 0.9993  | 0.7798      | 0.7926  | 0.8740  | 0.1129  | 0.2829  | 0.1513  | 0.3055         |
| GRIN2D        | 0.12               | 1.09        | 0.7205              | 0.5947  | 0.7130       | 0.5973 | 0.8152  | 0.8301      | 0.6179  | 0.6667  | 0.1942  | 0.0415  | 0.0957  | 0.3711         |
| HTR1A         | -0.28              | 0.82        | 0.0024              | 0.0438  | 0.0063       | 0.0021 | 0.0032  | 0.0455      | 0.0034  | 0.0038  | -0.3585 | -0.0491 | -0.0966 | 0.0186         |
| HTR1B         | -0.13              | 0.91        | 0.0239              | 0.1792  | 0.0355       | 0.0338 | 0.0346  | 0.0226      | 0.0333  | 0.0327  | -0.2488 | -0.0318 | -0.1773 | 0.0054         |
| HTR2A         | -0.12              | 0.92        | 0.2014              | 0.4612  | 0.2419       | 0.2251 | 0.3047  | 0.3432      | 0.2154  | 0.1939  | -0.2604 | -0.0935 | -0.1750 | 0.0259         |
| HTR2B         | -0.16              | 0.90        | 0.3446              | 0.6849  | 0.3635       | 0.3382 | 0.4626  | 0.3011      | 0.3233  | 0.3171  | -0.2934 | 0.0073  | -0.2288 | 0.0863         |
| HTR2C         | 0.83               | 1.78        | 0.0206              | 0.1465  | 0.0489       | 0.0255 | 0.0361  | 0.0743      | 0.0229  | 0.0233  | 0.5046  | -0.5921 | -0.1556 | 0.4975         |
| HTR3A         | 0.27               | 1.20        | 0.2495              | 0.6780  | 0.3757       | 0.2767 | 0.4043  | 0.4247      | 0.2610  | 0.3085  | -0.0283 | -0.3676 | -0.2488 | 0.1958         |
| HTR3A.1       | 0.03               | 1.02        | 0.8687              | 0.7193  | 0.8875       | 0.8038 | 0.9783  | 0.9101      | 0.7955  | 0.9410  | 1.0120  | 1.0505  | 0.9437  | 0.0533         |
| HTR3C         | 0.17               | 1.13        | 0.3250              | 0.8951  | 0.5727       | 0.3696 | 0.3547  | 0.1386      | 0.3354  | 0.2688  | 0.1949  | -0.2170 | 0.1822  | 0.0722         |
| HTR4          | 0.39               | 1.31        | 0.1763              | 0.3203  | 0.2851       | 0.1836 | 0.2283  | 0.7589      | 0.2236  | 0.1780  | 0.2979  | 0.1136  | -0.2338 | 0.3472         |
| HTR4.1        | 0.21               | 1.16        | 0.0766              | 0.3614  | 0.1428       | 0.0669 | 0.1483  | 0.2454      | 0.0848  | 0.1273  | -0.0729 | -0.3207 | -0.2651 | 0.0427         |
| HTR4.2        | -2.22              | 0.21        | 0.0000              | 0.0001  | 0.0000       | 0.0000 | 0.0000  | 0.0002      | 0.0000  | 0.0000  | -1.3025 | 1.0974  | 0.8029  | 0.1980         |
| HTR4.3        | -0.11              | 0.93        | 0.7767              | 0.8735  | 0.8288       | 0.7852 | 0.9659  | 0.9851      | 0.8300  | 0.8195  | 0.3718  | 0.3885  | 0.5401  | 0.4748         |
| HTR4.4        | -0.75              | 0.60        | 0.0003              | 0.0037  | 0.0010       | 0.0005 | 0.0009  | 0.0048      | 0.0006  | 0.0006  | -0.5470 | 0.4061  | 0.0628  | 0.0702         |
| HTR6          | 0.32               | 1.25        | 0.0471              | 0.1259  | 0.0116       | 0.0529 | 0.0340  | 0.5760      | 0.0567  | 0.0553  | 0.0971  | 0.0780  | -0.3158 | 0.0802         |
| HTR7          | -0.71              | 0.61        | 0.0001              | 0.0029  | 0.0005       | 0.0002 | 0.0004  | 0.0056      | 0.0002  | 0.0002  | -0.5816 | 0.2146  | 0.0719  | 0.0572         |
| HTR7.1        | 0.13               | 1.10        | 0.2350              | 0.2900  | 0.4020       | 0.2567 | 0.3366  | 0.6374      | 0.2574  | 0.2205  | -0.1161 | -0.2346 | -0.2617 | 0.0399         |
| HTR7.2        | 0.02               | 1.02        | 0.8028              | 0.4896  | 0.8150       | 0.7896 | 0.6376  | 0.8081      | 0.7008  | 0.8396  | -0.1707 | -0.1264 | -0.2375 | 0.0149         |
| HTR7.3        | -0.05              | 0.97        | 0.8130              | 0.7878  | 0.8868       | 0.8277 | 0.8387  | 0.8293      | 0.8063  | 0.8426  | -0.0769 | -0.1586 | 0.0590  | 0.1127         |
| MAP1A         | -0.04              | 0.97        | 0.9455              | 0.8273  | 0.7735       | 0.9698 | 0.9304  | 0.8180      | 0.9417  | 0.9267  | 0.2778  | 0.0484  | 0.4934  | 0.9345         |
| MAP1A.1       | 0.46               | 1.37        | 0.0005              | 0.0109  | 0.0008       | 0.0008 | 0.0005  | 0.0145      | 0.0011  | 0.0002  | 1.9867  | 1.4715  | 1.5660  | 0.0316         |
| MAP1A.2       | -0.41              | 0.75        | 0.1266              | 0.2219  | 0.2620       | 0.0987 | 0.2322  | 0.4940      | 0.1214  | 0.1458  | 1.0567  | 1.4276  | 1.4862  | 0.2830         |
| MAP1B         | 0.07               | 1.05        | 0.1429              | 0.3385  | 0.3201       | 0.1672 | 0.2664  | 0.1587      | 0.1540  | 0.2138  | -0.2204 | -0.3424 | -0.2595 | 0.0047         |
| MAP1B.1       | -0.21              | 0.87        | 0.0064              | 0.0450  | 0.0105       | 0.0051 | 0.0135  | 0.0534      | 0.0106  | 0.0069  | -0.3467 | -0.0890 | -0.1702 | 0.0134         |
| MAP1B.2       | -0.33              | 0.80        | 0.3117              | 0.2684  | 0.4734       | 0.3221 | 0.3988  | 0.8497      | 0.3313  | 0.2449  | -0.1613 | -0.0254 | 0.2951  | 0.4222         |
| MAP1B.3       | -0.55              | 0.68        | 0.1296              | 0.3958  | 0.3047       | 0.1242 | 0.2628  | 0.7175      | 0.1317  | 0.1292  | 0.2000  | 0.4851  | 0.9336  | 0.5733         |
| MAP2          | 0.04               | 1.03        | 0.7373              | 0.8042  | 0.9984       | 0.7092 | 0.9337  | 0.8202      | 0.6591  | 0.8497  | -0.1874 | -0.2444 | -0.2179 | 0.0353         |
| MAP2.1        | -0.03              | 0.98        | 0.6126              | 0.7762  | 0.6057       | 0.6207 | 0.6558  | 0.8560      | 0.5864  | 0.5280  | -0.2538 | -0.2279 | -0.2197 | 0.0079         |
| MAP2.5        | -0.26              | 0.83        | 0.0026              | 0.0296  | 0.0031       | 0.0032 | 0.0035  | 0.0615      | 0.0039  | 0.0025  | -0.3017 | -0.0268 | -0.0462 | 0.0167         |
| MAPT          | -1.80              | 0.29        | 0.0002              | 0.0022  | 0.0006       | 0.0004 | 0.0006  | 0.0140      | 0.0004  | 0.0003  | -0.6305 | 1.0288  | 1.2646  | 0.6144         |
| MAPT.1        | 0.29               | 1.22        | 0.1655              | 0.4186  | 0.3368       | 0.1287 | 0.2818  | 0.4638      | 0.1844  | 0.2248  | -0.0756 | -0.3671 | -0.3621 | 0.1607         |
| SNAP25        | -0.24              | 0.85        | 0.7019              | 0.9686  | 0.9252       | 0.7179 | 0.8269  | 0.8820      | 0.6900  | 0.7035  | 0.9861  | 0.7850  | 1.5221  | 1.5746         |
| SNAP25.1      | 0.07               | 1.05        | 0.4919              | 0.9805  | 0.4233       | 0.4224 | 0.5790  | 0.8694      | 0.4833  | 0.5362  | -0.1943 | -0.2332 | -0.2840 | 0.0269         |
| SNAP25.2      | -1.32              | 0.40        | 0.0359              | 0.0522  | 0.0646       | 0.0389 | 0.0527  | 0.1071      | 0.0367  | 0.0242  | -0.3878 | 1.1541  | 0.7833  | 1.8628         |
| SYN1          | -0.04              | 0.97        | 0.9360              | 0.8488  | 0.9160       | 0.9981 | 0.9892  | 0.8622      | 0.9308  | 0.9039  | 0.4711  | 0.2847  | 0.6683  | 0.9535         |
| SYN1.1        | -0.25              | 0.84        | 0.1935              | 0.6310  | 0.2162       | 0.2138 | 0.2500  | 0.3104      | 0.1817  | 0.1521  | 1.0630  | 1.4405  | 1.2279  | 0.1277         |
| SYN3          | -0.11              | 0.93        | 0.6733              | 0.8110  | 0.5482       | 0.6787 | 0.3977  | 0.8624      | 0.7163  | 0.6593  | 0.4123  | 0.5110  | 0.5282  | 0.2093         |
| N.Significant | NA                 | NA          | 6665                | 3510    | 5801         | 6518   | 5678    | 2504        | 6194    | 6583    | NA      | NA      | NA      | NA             |

**Supplemental Table S5.** Cofactorial analysis of genes of interest found in CA1 microarray data.

| Gene          | Fold Change (log2) | Fold Change | Q-value (No Adjust) | Q (ADT) | Q ( CNS Dis) | Q (pH)  | Q (PMI) | Q (Suicide) | Q (Age) | Q (Sex) | A0S0    | A1S0    | A1S1    | Error Variance |
|---------------|--------------------|-------------|---------------------|---------|--------------|---------|---------|-------------|---------|---------|---------|---------|---------|----------------|
| DLG1          | -0.25              | 0.84        | 0.2476              | 0.8790  | 0.3488       | 0.1577  | 0.2378  | 0.6013      | 0.2604  | 0.2476  | 0.1795  | 0.4332  | 0.4234  | 0.1758         |
| DLG2          | -1.00              | 0.50        | 0.0076              | 0.1173  | 0.0065       | 0.0084  | 0.0099  | 0.0212      | 0.0115  | 0.0076  | -0.7665 | 0.7571  | -0.0287 | 0.4137         |
| DLG3          | -0.30              | 0.81        | 0.0025              | 0.0200  | 0.0055       | 0.0038  | 0.0023  | 0.0863      | 0.0038  | 0.0025  | -0.3947 | -0.0529 | -0.1118 | 0.0205         |
| DLG4          | -0.22              | 0.86        | 0.5703              | 0.4394  | 0.4459       | 0.5936  | 0.5594  | 0.9740      | 0.5636  | 0.5703  | -0.0041 | -0.0355 | 0.3467  | 0.6278         |
| GRIA1         | -1.20              | 0.44        | 0.0010              | 0.0130  | 0.0027       | 0.0013  | 0.0020  | 0.0234      | 0.0010  | 0.0010  | -0.7051 | 0.7668  | 0.3564  | 0.3517         |
| GRIA1.1       | -1.16              | 0.45        | 0.0004              | 0.0019  | 0.0017       | 0.0004  | 0.0006  | 0.0278      | 0.0006  | 0.0004  | -0.4895 | 0.7826  | 0.6131  | 0.2443         |
| GRIA2         | -0.08              | 0.95        | 0.8188              | 0.9806  | 0.5223       | 0.8696  | 0.8561  | 0.4293      | 0.8227  | 0.8188  | 0.7986  | 1.2971  | 0.6682  | 0.3495         |
| GRIA2.1       | 0.00               | 1.00        | 0.9940              | 0.9186  | 0.9699       | 0.8877  | 0.9853  | 0.8206      | 0.9939  | 0.9940  | 1.1719  | 1.3164  | 1.1034  | 0.2520         |
| GRIA3         | -1.25              | 0.42        | 0.0014              | 0.0714  | 0.0033       | 0.0020  | 0.0021  | 0.3433      | 0.0022  | 0.0014  | -0.2737 | 0.3441  | 1.2933  | 0.3974         |
| GRIA3.1       | -3.55              | 0.09        | 0.00001             | 0.0003  | 0.00004      | 0.00002 | 0.00002 | 0.0016      | 0.00001 | 0.00001 | -1.5570 | 2.1285  | 1.9230  | 0.7211         |
| GRIA3.2       | 0.20               | 1.15        | 0.3462              | 0.8663  | 0.3784       | 0.2345  | 0.3973  | 0.3472      | 0.3577  | 0.3462  | -0.0535 | -0.4153 | -0.1695 | 0.1350         |
| GRIA3.3       | -0.43              | 0.74        | 0.0227              | 0.2381  | 0.0538       | 0.0317  | 0.0283  | 0.5903      | 0.0280  | 0.0227  | -0.1362 | 0.0788  | 0.3999  | 0.1113         |
| GRIA3.4       | -0.29              | 0.82        | 0.0092              | 0.0187  | 0.0023       | 0.0125  | 0.0075  | 0.1300      | 0.0120  | 0.0092  | -0.3993 | -0.0551 | -0.1316 | 0.0327         |
| GRIA4         | -0.01              | 0.99        | 0.9323              | 0.5427  | 0.9151       | 0.9703  | 0.9228  | 0.8107      | 0.9341  | 0.9323  | -0.2485 | -0.1787 | -0.2649 | 0.0424         |
| GRIN1         | 0.13               | 1.10        | 0.7300              | 0.8584  | 0.9038       | 0.7556  | 0.7234  | 0.9983      | 0.7337  | 0.7300  | 0.2590  | 0.2570  | 0.0615  | 0.5147         |
| GRIN1.1       | 0.34               | 1.27        | 0.1700              | 0.5027  | 0.2004       | 0.1520  | 0.1827  | 0.3489      | 0.1757  | 0.1700  | 0.5298  | 0.0657  | 0.2522  | 0.2528         |
| GRIN1.2       | 0.19               | 1.14        | 0.2382              | 0.8246  | 0.4498       | 0.2595  | 0.2599  | 0.5808      | 0.2632  | 0.2382  | 0.0759  | -0.1173 | -0.1093 | 0.0878         |
| GRIN2A        | -0.09              | 0.94        | 0.6069              | 0.7814  | 0.5782       | 0.4825  | 0.6151  | 0.6154      | 0.6168  | 0.6069  | 0.0137  | 0.1918  | 0.0548  | 0.0789         |
| GRIN2B        | 0.16               | 1.12        | 0.1007              | 0.6349  | 0.1772       | 0.1165  | 0.1213  | 0.5733      | 0.0738  | 0.1007  | -0.1454 | -0.2717 | -0.3240 | 0.0287         |
| GRIN2C        | 0.01               | 1.01        | 0.9734              | 0.9394  | 0.8364       | 0.9086  | 0.9751  | 0.9622      | 0.9737  | 0.9734  | 0.1580  | 0.1337  | 0.1580  | 0.1330         |
| GRIN2D        | -0.04              | 0.97        | 0.9147              | 0.4722  | 0.9087       | 0.9171  | 0.8670  | 0.8001      | 0.9185  | 0.9147  | 0.0083  | 0.1835  | -0.0161 | 0.4198         |
| HTR1A         | -0.07              | 0.95        | 0.5089              | 0.3129  | 0.6483       | 0.5491  | 0.5298  | 0.3076      | 0.5391  | 0.5089  | -0.2053 | -0.0063 | -0.2008 | 0.0233         |
| HTR1B         | 0.06               | 1.04        | 0.7395              | 0.9038  | 0.5128       | 0.6605  | 0.7471  | 0.9984      | 0.7368  | 0.7395  | -0.0817 | -0.0826 | -0.1723 | 0.0884         |
| HTR2A         | -0.29              | 0.82        | 0.1561              | 0.3844  | 0.2174       | 0.1573  | 0.1647  | 0.3811      | 0.1567  | 0.1561  | -0.3068 | 0.0130  | -0.0391 | 0.1465         |
| HTR2B         | -0.20              | 0.87        | 0.0578              | 0.1065  | 0.0456       | 0.0686  | 0.0693  | 0.4677      | 0.0647  | 0.0578  | -0.3168 | -0.1530 | -0.1057 | 0.0300         |
| HTR2C         | 0.09               | 1.06        | 0.6376              | 0.9474  | 0.6557       | 0.6318  | 0.6693  | 0.6033      | 0.6400  | 0.6376  | -0.1202 | -0.3000 | -0.1589 | 0.0963         |
| HTR3A         | 0.28               | 1.21        | 0.0153              | 0.2099  | 0.0203       | 0.0105  | 0.0204  | 0.3741      | 0.0195  | 0.0153  | -0.0366 | -0.2403 | -0.3505 | 0.0338         |
| HTR3A.1       | -0.03              | 0.98        | 0.9166              | 0.8631  | 0.9504       | 0.9196  | 0.9671  | 0.6280      | 0.9163  | 0.9166  | 1.0783  | 1.3107  | 1.0040  | 0.1603         |
| HTR3C         | 0.40               | 1.32        | 0.0760              | 0.7493  | 0.1277       | 0.0685  | 0.0873  | 0.1320      | 0.0794  | 0.0760  | 0.1989  | -0.4515 | -0.0757 | 0.1755         |
| HTR4          | 0.36               | 1.28        | 0.1672              | 0.9306  | 0.1996       | 0.1077  | 0.1892  | 0.2490      | 0.1747  | 0.1672  | 0.2343  | -0.3687 | -0.0052 | 0.2573         |
| HTR4.1        | -0.02              | 0.99        | 0.8846              | 0.8283  | 0.8911       | 0.9108  | 0.9141  | 0.7835      | 0.8886  | 0.8846  | -0.2317 | -0.1669 | -0.2385 | 0.0266         |
| HTR4.2        | -0.90              | 0.54        | 0.0003              | 0.0014  | 0.0013       | 0.0002  | 0.0006  | 0.0515      | 0.0005  | 0.0003  | -0.6110 | 0.2206  | 0.3260  | 0.1306         |
| HTR4.3        | 0.12               | 1.08        | 0.7326              | 0.9185  | 0.7622       | 0.7667  | 0.7285  | 0.7318      | 0.7345  | 0.7326  | 0.3656  | 0.1271  | 0.3086  | 0.4001         |
| HTR4.4        | -0.58              | 0.67        | 0.0022              | 0.0295  | 0.0049       | 0.0032  | 0.0032  | 0.0883      | 0.0031  | 0.0022  | -0.4643 | 0.1339  | 0.1002  | 0.0897         |
| HTR6          | 0.06               | 1.04        | 0.7832              | 0.8290  | 0.9285       | 0.8071  | 0.7798  | 0.8730      | 0.7900  | 0.7832  | 0.0478  | 0.1205  | 0.0747  | 0.1118         |
| HTR7          | -0.55              | 0.68        | 0.0003              | 0.0018  | 0.0008       | 0.0006  | 0.0006  | 0.0297      | 0.0006  | 0.0003  | -0.5262 | 0.0750  | -0.0015 | 0.0399         |
| HTR7.1        | 0.19               | 1.14        | 0.2649              | 0.4640  | 0.5384       | 0.2578  | 0.1812  | 0.3986      | 0.2820  | 0.2649  | 0.3085  | -0.0049 | 0.1803  | 0.0978         |
| HTR7.2        | 0.05               | 1.03        | 0.6141              | 0.9952  | 0.5378       | 0.6253  | 0.6552  | 0.7522      | 0.6220  | 0.6141  | -0.1432 | -0.2057 | -0.1802 | 0.0189         |
| HTR7.3        | 0.02               | 1.02        | 0.9217              | 0.9859  | 0.8870       | 0.9765  | 0.9579  | 0.7319      | 0.9229  | 0.9217  | -0.0002 | -0.1467 | 0.0394  | 0.1228         |
| MAP1A         | -0.02              | 0.98        | 0.9532              | 0.9973  | 0.8880       | 0.9385  | 0.9643  | 0.7748      | 0.9513  | 0.9532  | 0.1015  | 0.3124  | 0.0308  | 0.4167         |
| MAP1A.1       | 0.18               | 1.14        | 0.3669              | 0.5131  | 0.7830       | 0.2782  | 0.3617  | 0.8884      | 0.3514  | 0.3669  | 1.6159  | 1.6890  | 1.3028  | 0.1447         |
| MAP1A.2       | -0.93              | 0.53        | 0.0250              | 0.1480  | 0.0158       | 0.0314  | 0.0293  | 0.1705      | 0.0278  | 0.0250  | 0.4402  | 1.5712  | 1.2671  | 0.7618         |
| MAP1B         | 0.06               | 1.04        | 0.8229              | 0.9725  | 0.7972       | 0.8221  | 0.8421  | 0.8580      | 0.8266  | 0.8229  | -0.1339 | -0.2326 | -0.1695 | 0.1859         |
| MAP1B.1       | 0.10               | 1.08        | 0.5731              | 0.6040  | 0.5378       | 0.5028  | 0.5286  | 0.3501      | 0.5796  | 0.5731  | 0.0079  | -0.2957 | 0.0027  | 0.0923         |
| MAP1B.2       | -0.19              | 0.88        | 0.2042              | 0.5752  | 0.2404       | 0.2165  | 0.2268  | 0.2681      | 0.2164  | 0.2042  | -0.2238 | 0.1109  | -0.1066 | 0.0645         |
| MAP1B.3       | -0.85              | 0.56        | 0.0044              | 0.0744  | 0.0028       | 0.0056  | 0.0065  | 0.0392      | 0.0051  | 0.0044  | -0.3417 | 0.8674  | 0.3238  | 0.2498         |
| MAP2          | -0.05              | 0.97        | 0.6325              | 0.8044  | 0.7468       | 0.6292  | 0.6469  | 0.6785      | 0.6306  | 0.6325  | -0.2400 | -0.3188 | -0.1317 | 0.0167         |
| MAP2.1        | 0.16               | 1.12        | 0.1699              | 0.6219  | 0.2361       | 0.1443  | 0.1887  | 0.8576      | 0.1813  | 0.1699  | -0.1448 | -0.1948 | -0.3558 | 0.0356         |
| MAP2.5        | -0.32              | 0.80        | 0.0108              | 0.0275  | 0.0301       | 0.0141  | 0.0126  | 0.3020      | 0.0129  | 0.0108  | -0.3197 | -0.0767 | 0.0418  | 0.0400         |
| MAPT          | -0.70              | 0.61        | 0.0052              | 0.0255  | 0.0155       | 0.0078  | 0.0079  | 0.0524      | 0.0072  | 0.0052  | -0.0618 | 0.9404  | 0.4935  | 0.1810         |
| MAPT.1        | 0.01               | 1.01        | 0.9718              | 0.6283  | 0.9787       | 0.9433  | 0.9910  | 0.9776      | 0.9702  | 0.9718  | -0.1519 | -0.1653 | -0.1569 | 0.1095         |
| SNAP25        | -0.65              | 0.64        | 0.2142              | 0.9454  | 0.2180       | 0.1155  | 0.2195  | 0.3465      | 0.2277  | 0.2142  | 0.4781  | 1.4697  | 0.9560  | 1.3413         |
| SNAP25.1      | 0.37               | 1.29        | 0.0470              | 0.1910  | 0.0698       | 0.0532  | 0.0551  | 0.2985      | 0.0534  | 0.0470  | 0.1213  | -0.2882 | -0.2308 | 0.1256         |
| SNAP25.2      | -1.36              | 0.39        | 0.0039              | 0.0523  | 0.0098       | 0.0055  | 0.0053  | 0.1273      | 0.0026  | 0.0039  | -0.5574 | 0.7627  | 0.8152  | 0.8465         |
| SYN1          | -0.21              | 0.86        | 0.6279              | 0.8295  | 0.4184       | 0.5270  | 0.6222  | 0.8309      | 0.6291  | 0.6279  | 0.0644  | 0.2518  | 0.2909  | 0.7812         |
| SYN1.1        | -0.35              | 0.78        | 0.3506              | 0.4182  | 0.4165       | 0.3512  | 0.3573  | 0.7899      | 0.3664  | 0.3506  | 1.0264  | 1.2650  | 1.4369  | 0.6631         |
| SYN3          | -0.82              | 0.57        | 0.0005              | 0.0138  | 0.0015       | 0.0009  | 0.0009  | 0.0071      | 0.0009  | 0.0005  | -0.2005 | 0.9943  | 0.4249  | 0.0728         |
| N.Significant | NA                 | NA          | 7050                | 3343    | 5482         | 7043    | 6646    | 904         | 6711    | 7050    | NA      | NA      | NA      | NA             |

**Legend for Supplemental Tables 4 and 5:**

|                            |                                                               |
|----------------------------|---------------------------------------------------------------|
| <b>Gene</b>                | Gene Symbol                                                   |
| <b>Q-value (No Adjust)</b> | Unadjusted model (Q value)                                    |
| <b>Q (ADT)</b>             | Controlling for antidepressant prescription (Q value)         |
| <b>Q (CNS Dis)</b>         | Controlling for neurological disease (Q value)                |
| <b>Q (pH)</b>              | Controlling for pH (Q value)                                  |
| <b>Q (PMI)</b>             | Controlling for PMI (Q value)                                 |
| <b>Q (Suicide)</b>         | Controlling for mode of death (Q value)                       |
| <b>Q (Age)</b>             | Controlling for age (Q value)                                 |
| <b>Q (Sex)</b>             | Controlling for gender (Q value)                              |
| <b>A0S0</b>                | Control – non-suicidal (model-based mean estimate)            |
| <b>A1S0</b>                | Depressed – non-suicidal (model-based mean estimate)          |
| <b>A1S1</b>                | Depressed – suicidal (model-based mean estimate)              |
| <b>Error Variance</b>      | Error variance of the model                                   |
| <b>N. Significant</b>      | Number of significant ( $Q < .05$ ) genes across entire array |

**Supplemental Table S6.** Human subject samples used in qPCR analysis and names of the genes that were assessed in each subpopulation of DG and CA1 cohorts (n=5-6).

### Denate Gyrus

#### **qPCR Experiment #1 (n=6)**

| <i>Control</i> | <i>MDD</i> | <i>Gene(s) assessed</i> |
|----------------|------------|-------------------------|
| 23D            | 5B         | DLG2/SAP93              |
| 13D            | 11B        | MAP1a                   |
| 20D            | 20B        | MAP1b                   |
| 21D            | 21B        | AMPA1                   |
| 22D            | 22B        |                         |
| 17D            | 23B        |                         |

#### **qPCR Experiment #2 (n=6)**

| <i>Control</i> | <i>MDD</i> | <i>Gene(s) assessed</i> |
|----------------|------------|-------------------------|
| 4D             | 4B         | SNAP25                  |
| 23D            | 5B         | AMPA3                   |
| 13D            | 11B        | HTR4                    |
| 18D            | 18B        | HTR7                    |
| 22D            | 22B        |                         |
| 17D            | 23B        |                         |

#### **qPCR Experiment #3 (n=5)**

| <i>Control</i> | <i>MDD</i> | <i>Gene(s) assessed</i> |
|----------------|------------|-------------------------|
| 3D             | 3B         | HTR2c                   |
| 4D             | 4B         |                         |
| 13D            | 11B        |                         |
| 7D             | 14B        |                         |
| 18D            | 18B        |                         |

### CA1

#### **qPCR Experiment #4 (n=6)**

| <i>Control</i> | <i>MDD</i> | <i>Gene(s) assessed</i> |
|----------------|------------|-------------------------|
| 8D             | 8B         | DLG2/SAP93              |
| 6D             | 13B        | SNAP25                  |
| 16D            | 16B        | MAP1a                   |
| 23D            | 17B        | MAP1b                   |
| 19D            | 19B        | HTR2c                   |
| 4D             | 23B        |                         |

#### **qPCR Experiment #5 (n=6)**

| <i>Control</i> | <i>MDD</i> | <i>Gene(s) assessed</i> |
|----------------|------------|-------------------------|
| 6D             | 13B        | AMPA1                   |
| 14D            | 14B        | AMPA3                   |
| 23D            | 17B        | HTR4                    |
| 15D            | 18B        | HTR7                    |
| 22D            | 22B        |                         |
| 4D             | 23B        |                         |



**Supplemental Table S7.** Human primers used in qPCR analysis.

| <b>Gene</b> | <b>Forward Primer</b>            | <b>Reverse Primer</b>          |
|-------------|----------------------------------|--------------------------------|
| GAPDH       | 5'-cgggaaactgtggcgtgatgg-3'      | 5'-gccagtgagctcccgttcagc-3'    |
| Cyclophilin | 5'-caaatcagaatgggacaggtggag-3'   | 5'-gtttgtgtgcggcctgcatttg-3'   |
| HMBS        | 5'-gcttcctcctggcttcacccatcg-3'   | 5'-ctttctctgcagctgggctgctc-3'  |
| B-Tubulin   | 5'-cagggcttcagctgacccactc-3'     | 5'-gtgagggcatgacgctgaagggtg-3' |
| GLUR1       | 5'-cggaaaccctgtgacaccatgaag-3'   | 5'-cgccctgtctgaccaccatttg-3'   |
| GLUR3       | 5'-catgaaatcagcggagccatctg-3'    | 5'-catggtgactccagcaggaagg-3'   |
| GLUR4       | 5'-cactgggagtggtggagagaatgg-3'   | 5'-cgatgcaatgacagccaatctg-3'   |
| HTR2C       | 5'-caacacgacgtgctgctcaac-3'      | 5'-ctcgggtggccgtgcagtaac-3'    |
| HTR4        | 5'-ctgggcagggtggactgcttc-3'      | 5'-cttcggtagcgtcatcatcacagc-3' |
| HTR7        | 5'-ctgtgctgatcagcattgacagg-3'    | 5'-gctggagagaagccagacggagag-3' |
| SNAP25      | 5'-gccagcctgctcgtgtagtggac-3'    | 5'-gtgacggaggtcccgatgatgc-3'   |
| ITGB1       | 5'-gcctctgggctttacggaggaag-3'    | 5'-caacacgcccttcattgcacctg-3'  |
| DLG2        | 5'-cagtgggctgccaagtcaaggac-3'    | 5'-cgggcacgttcctttctttccac-3'  |
| MAP1A       | 5'-cagtgccaccacacacccttc-3'      | 5'-gcagcatctctttgcccacacc-3'   |
| MAP1B       | 5'-gtgtgaacttctctctgacgccaatg-3' | 5'-gccagtcacggactgagatggtg-3'  |

**Supplemental Table S8.** Rat primers used in *in situ* hybridization experiments. T7 polymerase-binding promoter sequence was added to the 5' end of the reverse primer (5'CCAAGCCTTCTAATACGACTCACTATAGGGAGA3').

| <b>Gene</b> | <b>Forward Primer</b>         | <b>Reverse Primer</b>         |
|-------------|-------------------------------|-------------------------------|
| SNAP25      | 5'-cgaacaactggaacgcattgag-3'  | 5'-gtttgtaccctgcggatgaagc-3'  |
| GLUR1       | 5'-cgaaggtttgacaggaaatgtgc-3' | 5'-gtagccctcatagcggtcattgc-3' |
| GLUR3       | 5'-gcagaagccttccgatacctgag-3' | 5'-cggttctctgaggatgagctgac-3' |
| HTR4        | 5'-ctctgctgcattccctggatag-3'  | 5'-gtgatggcatagggcttgtgac-3'  |

**Supplemental Figure S1.** Two-dimensional non-metric multi-dimensional scaling analysis from the DG samples on the basis of the genes in Supplemental Table 4.

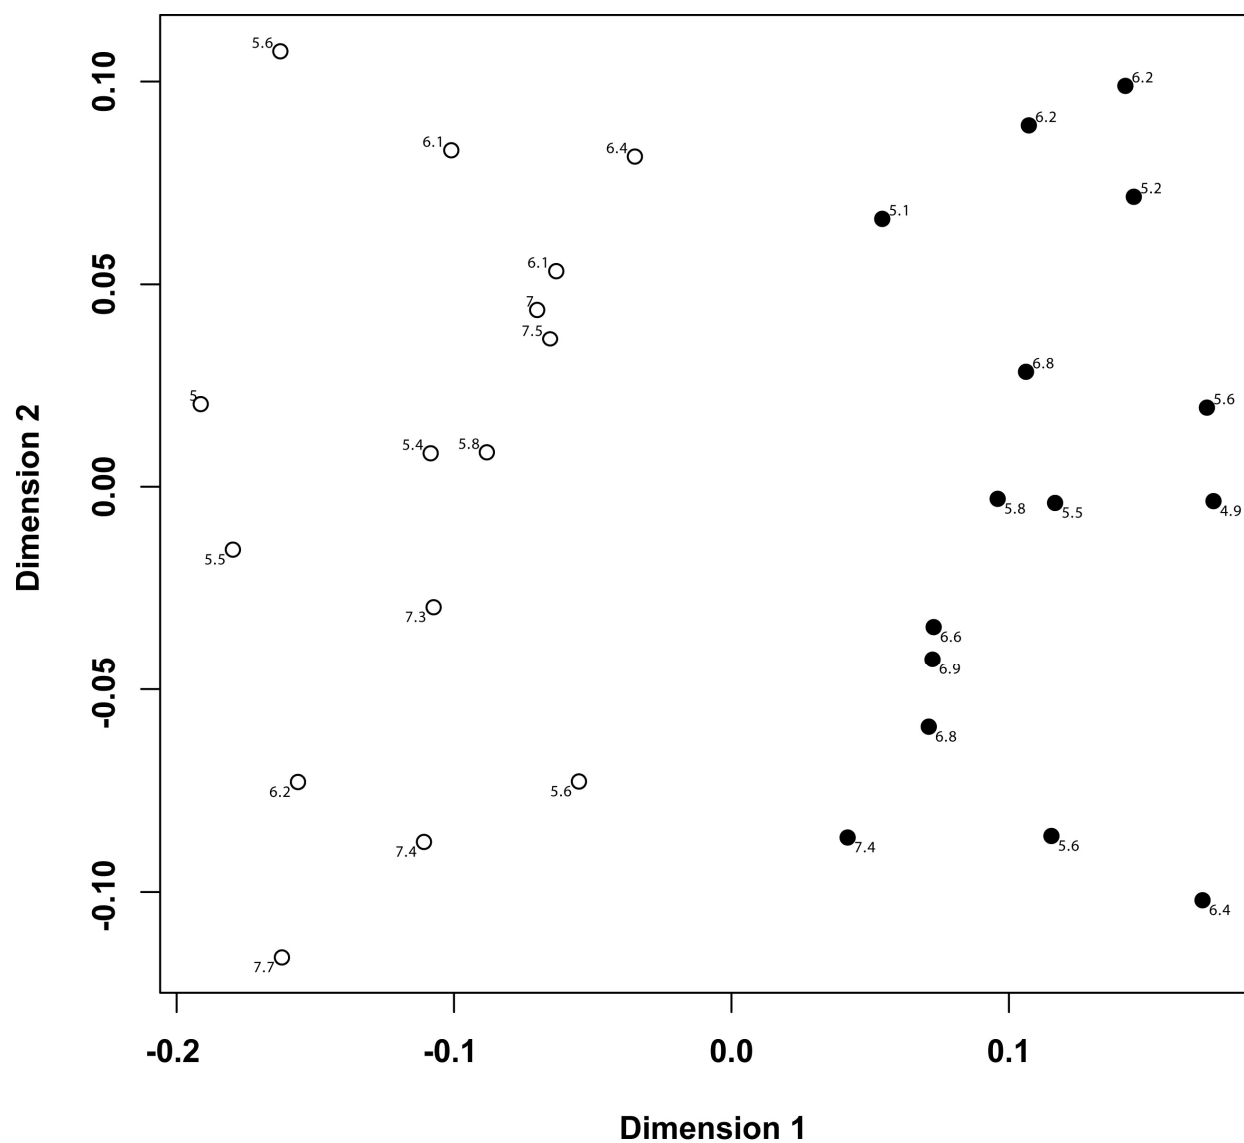

**Supplemental Figure S2.** Two-dimensional non-metric multi-dimensional scaling analysis from the CA1 samples on the basis of the genes in Supplemental Table 5.

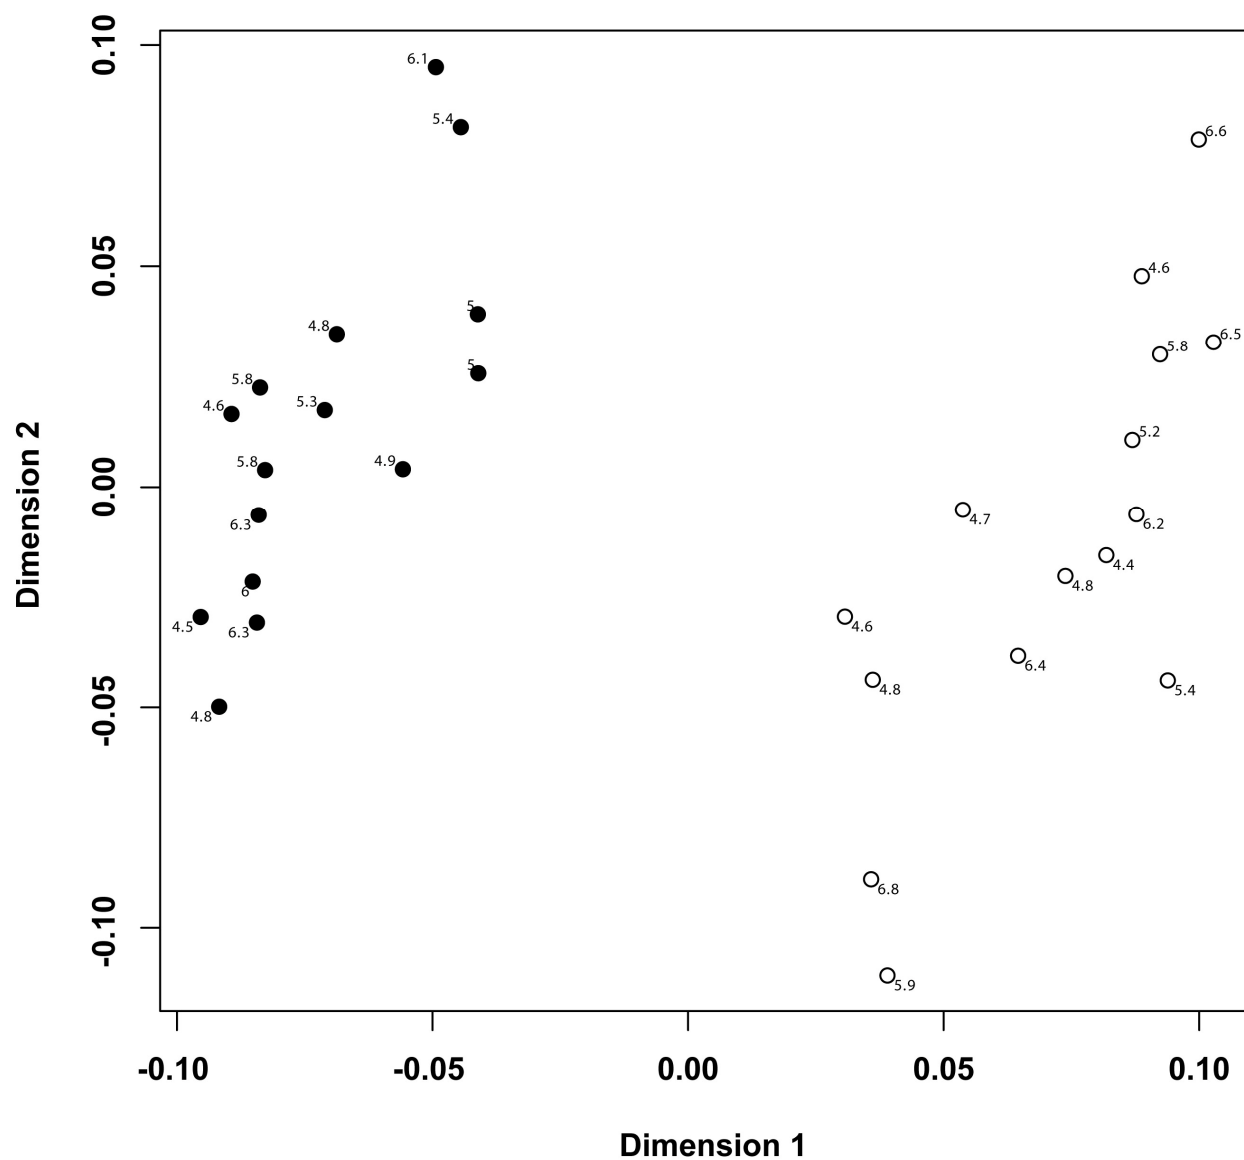

Supplement: NIHMS372439-supplement-Supplementary_Data.pdf [file NIHMS372439-supplement-Supplementary_Data.pdf]
